# Supplementary material for: ZnO/SiO2 core/shell nanowires for capturing CpG rich single-stranded DNAs
Source: Royal Society of Chemistry journal article supplement (doi:10.1039/d0ay02138e), 2020-12-21
Supplement: d0ay02138e1.pdf [file d0ay02138e1.pdf]

## Supplementary information for

### ZnO/SiO<sub>2</sub> core/shell nanowires for capturing CpG rich single-stranded DNAs

Marina Musa,<sup>1</sup> Takao Yasui,<sup>1-3</sup> Kazuki Nagashima,<sup>2,4</sup> Masafumi Horiuchi,<sup>1</sup> Zetao Zhu,<sup>1</sup> Quanli Liu,<sup>1</sup> Taisuke Shimada,<sup>1</sup> Akihide Arima,<sup>1</sup> Takeshi Yanagida,<sup>4,5</sup> Yoshinobu Baba<sup>1,3,6</sup>

<sup>1</sup>Department of Biomolecular Engineering, Graduate School of Engineering, Nagoya University, Furo-cho, Chikusa-ku, Nagoya 464-8603, Japan

<sup>2</sup>Japan Science and Technology Agency (JST), Precursory Research for Embryonic Science and Technology (PRESTO), 4-1-8 Honcho, Kawaguchi, Saitama 332-0012, Japan

<sup>3</sup>Institute of Nano-Life-Systems, Institutes of Innovation for Future Society, Nagoya University, Furo-cho, Chikusa-ku, Nagoya 464-8603, Japan.

<sup>4</sup>Department of Applied Chemistry, Graduate School of Engineering, The University of Tokyo, 7-3-1 Hongo, Bunkyo-ku, Tokyo 113-8656, Japan.

<sup>5</sup>Institute of Materials Chemistry and Engineering, Kyushu University, 6-1 Kasuga-Koen, Kasuga, Fukuoka 816-8580, Japan.

<sup>6</sup>Institute of Quantum Life Science, National Institutes for Quantum and Radiological Science and Technology, Anagawa 4-9-1, Inage-ku, Chiba 263-8555, Japan.

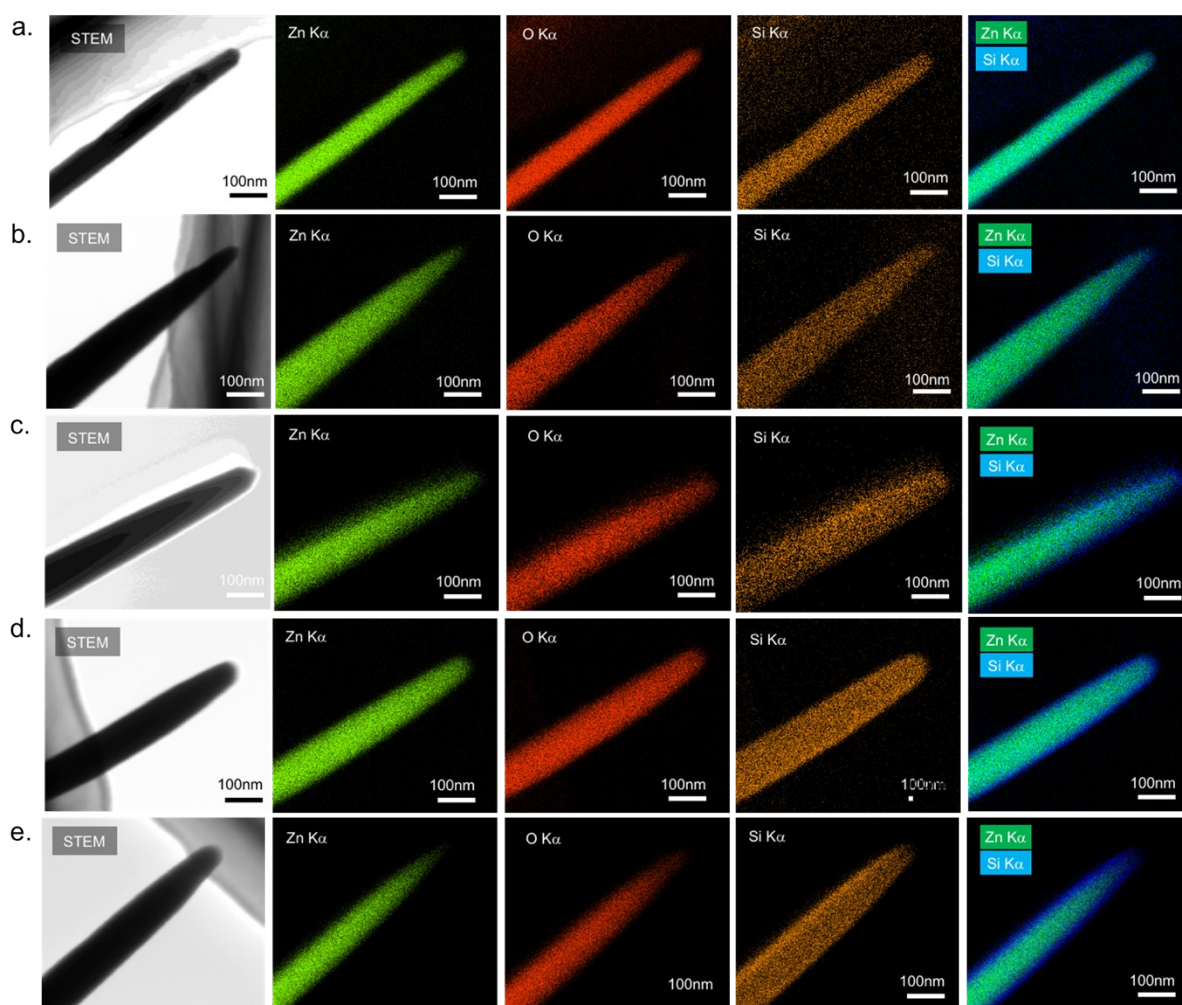

**Supplementary Figure 1.** STEM-EDS elemental mapping of ZnO/SiO<sub>2</sub> nanowires fabricated with different numbers of ALD cycles. **(a)** 10 cycles. **(b)** 25 cycles. **(c)** 55 cycles. **(d)** 100 cycles. **(e)** 200 cycles. Zn, O and Si are respectively highlighted as green, red and orange for single elemental mappings, and Zn and Si are respectively highlighted as green and blue for dual elemental mappings.

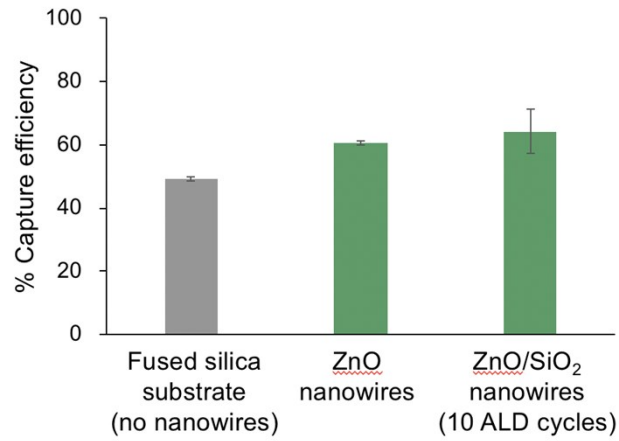

**Supplementary Figure 2.** Capture efficiency of ssDNAs on fused silica substrate (no nanowires), ZnO nanowires and ZnO/SiO<sub>2</sub> nanowires (10 ALD cycles). Experimental conditions: 50  $\mu$ L of 50 ng/ $\mu$ L DNA solution; flow rate 5  $\mu$ L/min.
